# Supplementary material for: Some new azobenzene liquid crystals involving chalcone and ester linkages
Source: Royal Society of Chemistry journal article supplement (doi:10.1039/c7ra06958h), 2017-01-01
Supplement: c7ra06958h1.pdf [file c7ra06958h1.pdf]

## Electronic Supplementary Information

### A new azobenzene liquid crystal involving chalcone and ester linkages

Xueyou Zhu, Fengnan Yin, Haiying Zhao\*, Shufeng Chen and Zhanxi Bian

Inner Mongolia Key Laboratory of Fine Organic Synthesis, College of Chemistry and Chemical Engineering, Inner Mongolia University, Hohhot 010021, China. E-mail: hyzhao@imu.edu.cn

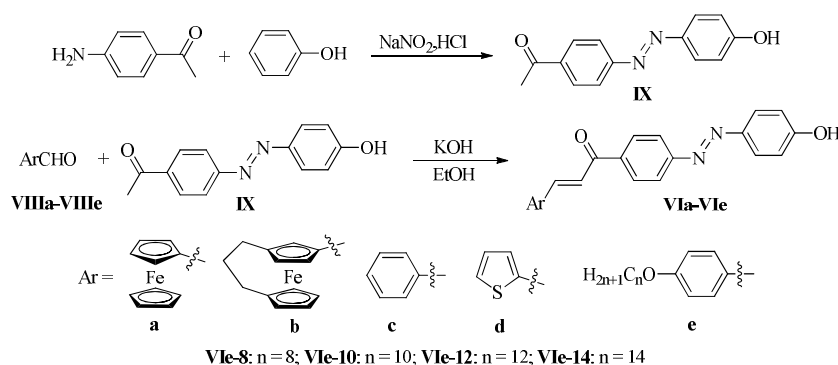

Scheme S1 Synthesis of compounds **VIa-VIe**

1-(4-((4-hydroxyphenyl)diazanyl)phenyl)ethanone **IX**: To 10 mmol of *p*-acetylphenylamine, 2.7 mL of concentrated hydrochloric acid and 20 mL of water were added. The mixture was placed in the ice bath. To the cooled mixture, a solution of 10 mmol of sodium nitrite in 3 mL of water was added dropwise and the resulting solution was stirred at a temperature between 0 and 5 °C within 15 min. Subsequently, the solution containing 10 mmol of phenol in 6 mL of methanol was added dropwise. The reaction was stirred for 30 min and was neutralized with sodium acetate. After the temperature was raised to room temperature, the mixture was stirred for 1 h. The product was filtered, washed with large amount of water and dried under vacuum. Yield 80%, m.p. 191-192 °C,  $R_f = 0.16$  (petroleum ether:ethyl acetate = 5:1);  $^1\text{H NMR}$  (500 MHz, DMSO) ( $\delta$  ppm): 10.46 (s, 1H, OH), 8.13 (d,  $J = 8.5$  Hz, 2H,  $\text{C}_6\text{H}_4$ ), 7.91 (d,  $J = 8.5$  Hz, 2H,  $\text{C}_6\text{H}_4$ ), 7.86 (d,  $J = 9.0$  Hz, 2H,  $\text{C}_6\text{H}_4$ ), 6.97 (d,  $J = 9.0$  Hz, 2H,  $\text{C}_6\text{H}_4$ ), 2.64 (s, 3H,  $\text{CH}_3$ ).

Aromatic aldehyde **IIIIV** (0.1 mol) and **IX** (0.12 mol) were dissolved in 5 mL of anhydrous ethanol, to which the solution of KOH (0.4 g, 7.14 mmol) in 1 mL of  $\text{H}_2\text{O}$  was added dropwise at room temperature. The reaction mixture was stirred at room temperature for 4 h, and then neutralized with dilute HCl. The aqueous phase was extracted with EtOAc, and the combined organic phases were washed with  $\text{H}_2\text{O}$ , 5%  $\text{NaHCO}_3$  solution and  $\text{H}_2\text{O}$ , dried over anhydrous  $\text{Na}_2\text{SO}_4$  and concentrated in vacuo. The residue was subjected to flash silica gel column chromatography with benzene / EtOAc (40:1, V:V) as eluent. The second fraction was the desired product **VI**.

**VIa**: yield 63%, m.p. 204-206 °C,  $R_f = 0.43$  (benzene:ethyl acetate = 10:1);  $^1\text{H NMR}$  (500 MHz, DMSO) ( $\delta$  ppm): 10.49 (s, 1H, OH), 8.25 (d,  $J = 7.0$  Hz, 2H,  $\text{C}_6\text{H}_4$ ), 7.94 (d,  $J = 7.0$  Hz, 2H,  $\text{C}_6\text{H}_4$ ), 7.88 (d,  $J = 7.0$  Hz, 2H,  $\text{C}_6\text{H}_4$ ), 7.73 (d,  $J = 15.0$  Hz, 1H, CH), 7.51 (d,  $J = 15.0$  Hz, 1H, CH), 6.98 (d,  $J = 7.0$  Hz, 2H,  $\text{C}_6\text{H}_4$ ), 4.90 (s, 2H, FcH), 4.59 (s, 2H, FcH), 4.22 (s, 5H, FcH).

**VIb**: yield 61.8%, m.p. 185-187 °C,  $R_f = 0.39$  (Benzene:Ethyl acetate = 10:1);  $^1\text{H NMR}$  (500 MHz, DMSO) ( $\delta$

ppm): 10.48 (s, 1H, OH), 8.20 (d,  $J = 8.5$  Hz, 2H, C<sub>6</sub>H<sub>4</sub>), 7.92 (d,  $J = 8.5$  Hz, 2H, C<sub>6</sub>H<sub>4</sub>), 7.87 (d,  $J = 9.0$  Hz, 2H, C<sub>6</sub>H<sub>4</sub>), 7.62 (d,  $J = 15.0$  Hz, 1H, CH), 7.38 (d,  $J = 15.0$  Hz, 1H, CH), 6.98 (d,  $J = 8.8$  Hz, 2H, C<sub>6</sub>H<sub>4</sub>), 4.81 (s, 1H, FcH), 4.69 (s, 1H, FcH), 4.46 (s, 1H, FcH), 4.34 (s, 1H, FcH), 4.30 (s, 1H, FcH), 3.97 (s, 1H, FcH), 3.88 (s, 1H, FcH), 2.14 – 1.85 (m, 6H, CH<sub>2</sub>).

**VIc**: yield 66%, m.p. 192-198 °C,  $R_f = 0.167$  (benzene:ethyl acetate = 40:1); <sup>1</sup>H NMR (500 MHz, DMSO) ( $\delta$  ppm): 10.56 (s, 1H, OH), 8.41 (d,  $J = 8.5$  Hz, 2H, C<sub>6</sub>H<sub>4</sub>), 8.09 (d,  $J = 15.5$  Hz, 1H, CH), 8.04 – 7.96 (m, 4H C<sub>6</sub>H<sub>4</sub>, C<sub>6</sub>H<sub>5</sub>), 7.96 – 7.92 (m, 2H, C<sub>6</sub>H<sub>4</sub>), 7.86 (d,  $J = 15.5$  Hz, 1H, CH), 7.57 – 7.52 (m, 3H, C<sub>6</sub>H<sub>5</sub>), 7.07 – 7.01 (m, 2H, C<sub>6</sub>H<sub>4</sub>).

**VIId**: yield 65%, m.p. 203-208 °C,  $R_f = 0.42$  (benzene:ethyl acetate = 20:1); <sup>1</sup>H NMR (500 MHz, DMSO) ( $\delta$  ppm): 10.49 (s, 1H, OH), 8.28 (d,  $J = 8.5$  Hz, 2H, C<sub>6</sub>H<sub>4</sub>), 7.97 (d,  $J = 15.5$  Hz, 1H, CH), 7.94 (d,  $J = 8.5$  Hz, 2H, C<sub>6</sub>H<sub>4</sub>), 7.87 (d,  $J = 8.5$  Hz, 2H, C<sub>6</sub>H<sub>4</sub>), 7.82 (d,  $J = 5.1$  Hz, 1H, TpH), 7.74 (d,  $J = 4.0$  Hz, 1H, TpH), 7.63 (d,  $J = 15.5$  Hz, 1H, CH), 7.22 (m, 1H, TpH), 6.98 (d,  $J = 8.5$  Hz, 2H, C<sub>6</sub>H<sub>4</sub>).

**VIe-8**: yield 55% , m.p.159~160°C ,  $R_f=0.32$  (Ethyl acetate: Petroleum ether =1: 4) , <sup>1</sup>H NMR (500 MHz, DMSO)  $\delta$  10.50 (s, 1H), 8.32 (d,  $J = 8.5$  Hz, 2H), 7.95 (d,  $J = 8.5$  Hz, 2H), 7.87 (t,  $J=9.0$  Hz, 5H), 7.77 (d,  $J = 15.5$  Hz, 1H), 7.00 (t,  $J = 9.5$  Hz, 4H), 4.01 (t,  $J = 6.5$  Hz, 2H), 1.75 ~ 1.66 (m, 2H), 1.43 ~ 1.35 (m, 2H), 1.29~1.25 (m, 8H), 0.86 (t,  $J = 6.5$  Hz, 3H). <sup>13</sup>C NMR (126 MHz, DMSO)  $\delta$  188.66, 162.22, 161.43, 154.87, 145.88, 144.86, 139.17, 131.40, 130.22, 127.59, 125.84, 122.72, 119.78, 116.56, 115.30, 68.17, 40.16, 39.99, 39.83, 39.66, 39.49, 31.72, 29.32, 29.15, 29.07, 25.96, 22.56, 14.42.HRMS, m/z: Calcd for C<sub>29</sub>H<sub>32</sub>N<sub>2</sub>O<sub>3</sub>: 455.2329 [M-H]<sup>-</sup> found: 455.2340.

**VIe-10**, Yield 55% m.p.153~154°C ,  $R_f=0.35$  (Ethyl acetate: Petroleum ether =1: 4) , <sup>1</sup>H NMR (500 MHz, DMSO)  $\delta$  10.41 (s, 1H), 8.12 (d,  $J = 8.5$  Hz, 2H), 7.68 (d,  $J = 8.5$  Hz, 2H), 7.89 ~ 7.75 (m, 5H), 7.71 (d,  $J = 15.5$  Hz, 1H), 4.02 (t,  $J = 6.5$  Hz, 2H), 1.73 ~ 1.68(m, 2H), 1.40 (d,  $J = 7.5$  Hz , 2H), 1.29~1.20 (m, 17H), 0.88 (t,  $J = 6.7$  Hz .3H). HRMS, m/z: Calcd for C<sub>31</sub>H<sub>36</sub>N<sub>2</sub>O<sub>3</sub>:483.2642 [M-H]<sup>-</sup> found: 483.2641.

**VIe-12**, yield 55%, m.p. 149~150 °C ,  $R_f=0.36$  (Ethyl acetate: Petroleum ether =1: 4) <sup>1</sup>H NMR (500 MHz, DMSO)  $\delta$  10.49 (s, 1H), 8.32 (d,  $J = 8.5$  Hz, 2H), 7.94 (d,  $J = 8.5$  Hz, 2H), 7.90 ~ 7.85 (m, 5H), 7.76 (d,  $J = 15.5$ Hz, 1H), 4.04 (t,  $J = 6.5$  Hz , 2H), 1.75 ~ 1.70 (m, 2H), 1.41(d,  $J = 7.5$  Hz , 2H ), 1.32~1.25 (m, 17H), 0.85 (t,  $J = 6.5$  Hz . 3H ). HRMS, m/z: Calcd for C<sub>33</sub>H<sub>40</sub>N<sub>2</sub>O<sub>3</sub>: 511.2955 [M-H]<sup>-</sup> found: 511.2943.

**VIe-14**, yield 55%, m.p.148~149°C ,  $R_f=0.38$  (Ethyl acetate: Petroleum ether =1: 4) , <sup>1</sup>H NMR (500 MHz, DMSO)  $\delta$  10.56 (s, 1H), 8.39 (d,  $J = 8.5$  Hz, 2H), 8.01 (d,  $J = 8.5$  Hz, 2H), 7.98 ~ 7.88 (m, 5H), 7.83 (d,  $J = 15.5$  Hz, 1H), 7.08 (d,  $J = 8.5$  Hz, 2H), 7.04 (d,  $J = 9.0$  Hz, 2H), 4.10 (t,  $J = 6.5$  Hz, 2H), 1.78 (dd,  $J = 14.5$ , 6.8 Hz, 2H), 1.47 (d,  $J = 7.5$  Hz, 2H), 1.41 ~ 1.27 (m, 20H), 0.91 (t,  $J = 7.0$  Hz, 3H). HRMS, m/z: Calcd for C<sub>35</sub>H<sub>44</sub>N<sub>2</sub>O<sub>3</sub>: 539.3268 [M-H]<sup>-</sup> found: 539.3218.

**Table S1** UV-vis absorption data of selected compounds in CH<sub>2</sub>Cl<sub>2</sub>.

| Compd.       | Absorption $\lambda_{\max}$ / nm (log $\epsilon$ / L cm <sup>-1</sup> mol <sup>-1</sup> ) |            |            |
|--------------|-------------------------------------------------------------------------------------------|------------|------------|
| <b>Ia-8</b>  | 261 (5.45)                                                                                | 347 (5.67) | 523 (4.65) |
| <b>Ib-8</b>  | 261 (5.45)                                                                                | 346 (5.66) | 535 (4.82) |
| <b>Ic-8</b>  | 263 (5.47)                                                                                | 345 (5.73) | -          |
| <b>Id-8</b>  | 266 (5.41)                                                                                | 358 (5.70) | -          |
| <b>Iic-8</b> | 266 (4.44)                                                                                | 357 (4.51) | -          |
| <b>Iid-8</b> | 282 (2.30)                                                                                | 357 (4.65) | -          |
| <b>III-8</b> | 266 (4.44)                                                                                | 356 (4.51) | -          |
| <b>IV-8</b>  | 262 (4.42)                                                                                | 357 (4.67) | -          |
| <b>V</b>     | 259 (4.71)                                                                                | 350 (4.69) | -          |

**Table S2** Phase transition temperatures and associated enthalpies of compounds **I-III**.

| Compd.        | Phase transitions <sup>a</sup> °C ( $\Delta H$ /kJ mol <sup>-1</sup> )                                                |                                                                                        |                                                             |
|---------------|-----------------------------------------------------------------------------------------------------------------------|----------------------------------------------------------------------------------------|-------------------------------------------------------------|
|               | First heating                                                                                                         | Second heating                                                                         | First cooling                                               |
| <b>Ia-8</b>   | C <sub>1</sub> 162.3 (11.2) C <sub>2</sub> 187.8 (38.2) I                                                             | C <sub>1</sub> 163.7 (-7.6) C <sub>2</sub> 187.9 (39.7) I                              | I 167.2 (-30.9) C                                           |
| <b>Ia-10</b>  | C 183.6 (74.4) I                                                                                                      | C <sub>1</sub> 128.1 (-4.2) C <sub>2</sub> 170.8 (27.8) I                              | I 147.4 (-4.0) C <sub>2</sub> 139.8 (-4.8) C <sub>1</sub>   |
| <b>Ia-12</b>  | C <sub>1</sub> 105.8 (26.9) C <sub>2</sub> 165.4 (6.1) C <sub>3</sub> 175.6 (27.4) I                                  | C <sub>1</sub> 107.9 (1.4) C <sub>2</sub> 173.5 (34.0) I                               | I 162.8 (-36.8) C <sub>2</sub> 98.0 (-1.6) C <sub>1</sub>   |
| <b>Ia-14</b>  | C <sub>1</sub> 101.8 (4.7) C <sub>2</sub> 126.7 (20.3) C <sub>3</sub> 168.7 (28.3) I                                  | C <sub>1</sub> 105.2 (4.1) C <sub>2</sub> 165.3 (9.2) C <sub>3</sub> 172.5 (2.5) I     | I 160.1 (-26.6) C <sub>2</sub> 97.5 (-5.5) C <sub>1</sub>   |
| <b>Ia-16</b>  | C <sub>1</sub> 106.5 (15.3) C <sub>2</sub> 174.9 (41.8) I                                                             | C <sub>1</sub> 108.7 (5.6) C <sub>2</sub> 168.7 (27.1) I                               | I 158.4 (28.5) C <sub>2</sub> 102.4 (6.9) C <sub>1</sub>    |
| <b>Ib-8</b>   | C <sub>1</sub> 149.3 (38.2) C <sub>2</sub> 154.3 (1.5) I                                                              | C 143.5 (36.3) I                                                                       | I 80.4 (-6.2) Tg                                            |
| <b>Ib-12</b>  | C <sub>1</sub> 99.6 (9.5) C <sub>2</sub> 149.1 (44.2) I                                                               | C <sub>1</sub> 108.9 (-5.5) C <sub>2</sub> 148.1 (39.8) I                              | I 108.8 (-30.5) C                                           |
| <b>Iic-8</b>  | C 73.46 (35.1) I                                                                                                      | C 113.89 (13.8) I                                                                      | I 7.78 (-12.4) C                                            |
| <b>Iic-14</b> | C <sub>1</sub> 53.81 (7.1) C <sub>2</sub> 72.68 (65.7) I                                                              | C <sub>1</sub> 17.13 (11.6) C <sub>2</sub> 68.09 (22.1) C <sub>3</sub> 73.10 (41.7) I  | I 57.25 (-60.6) C <sub>1</sub> 11.02 (-10.5) C <sub>2</sub> |
| <b>Iid-8</b>  | C <sub>1</sub> 94.07 (50.6) I                                                                                         | C <sub>1</sub> 26.12 (14.9) C <sub>2</sub> 46.53 (-32.5) C <sub>3</sub> 98.08 (49.4) I | I 20.82 (-15.7) C <sub>1</sub>                              |
| <b>III-8</b>  | C <sub>1</sub> 135.24 (20.6) C <sub>2</sub> 184.84 (45.1) I                                                           | C 185.03(42.3) I                                                                       | 171.02 (43.6) C                                             |
| <b>III-14</b> | C <sub>1</sub> 105.56 (14.7) C <sub>2</sub> 136.22 (11.0) C <sub>3</sub> 168.87 (35.2) C <sub>4</sub> 173.58 (10.7) I | C <sub>1</sub> 148.34 (2.5) C <sub>2</sub> 170.09 (44.2) I                             | I 165.73(-42.6) C <sub>1</sub> 147.49 (-2.0) C <sub>2</sub> |

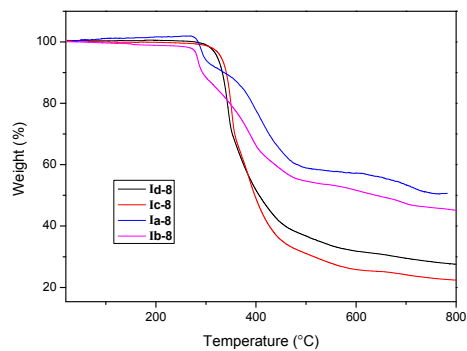

Fig. S1 TG curves of **Ia-Id**

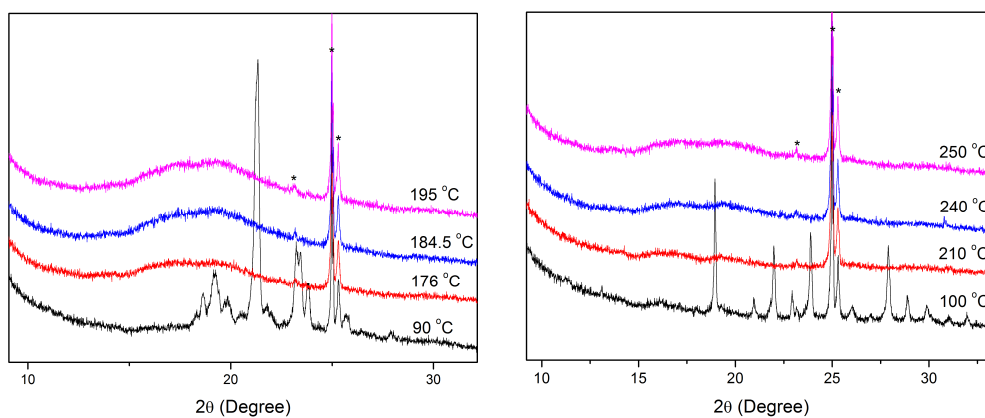

Fig. S2 XRD patterns of compound **IV-10** (left) and **V** (right) on cooling. Asterisks in the spectrum show the alumina from the sample cell holder.

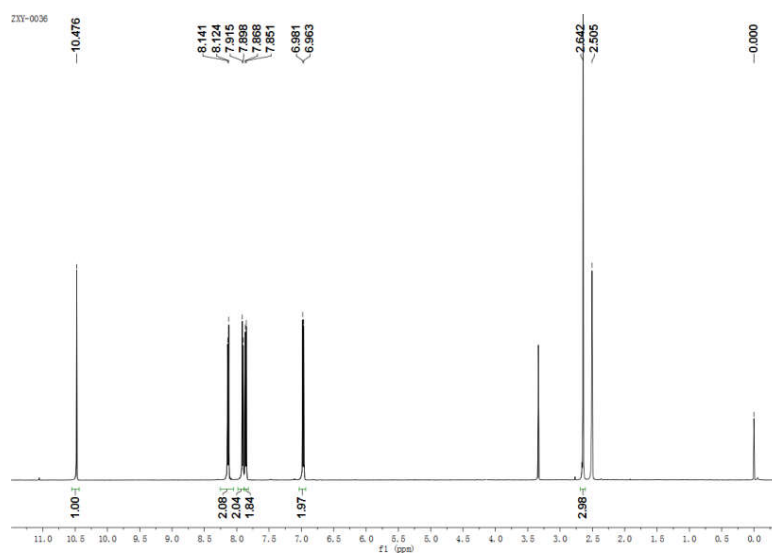

Fig. S3  $^1\text{H}$  NMR of compound **IX**

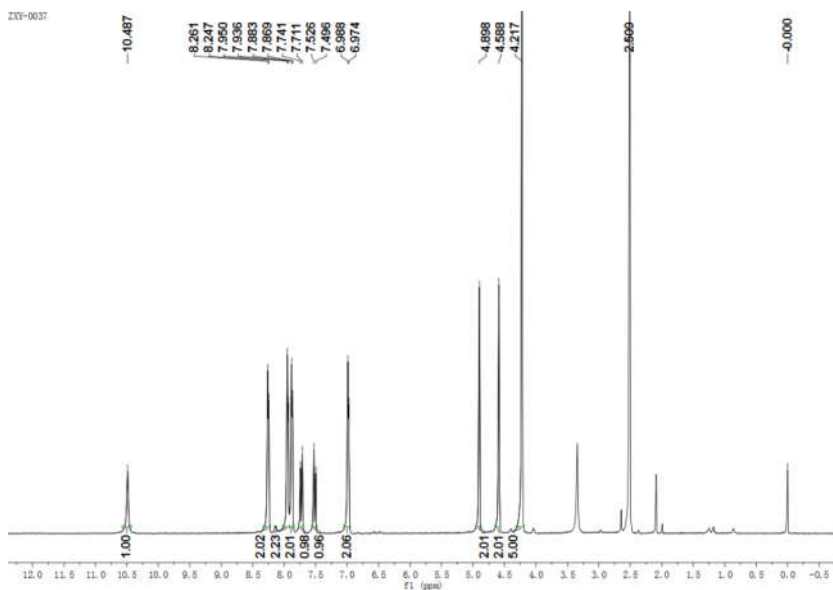

Fig. S4  $^1\text{H}$  NMR of compound VIa

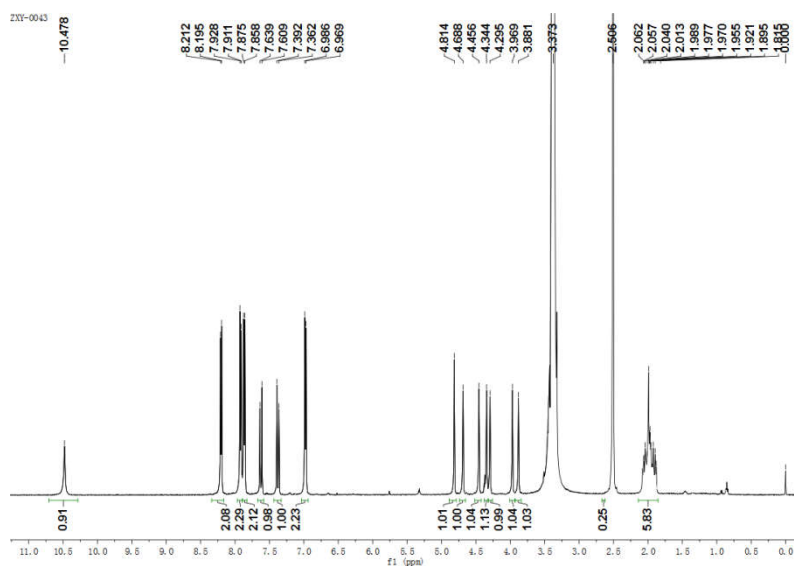

Fig. S5  $^1\text{H}$  NMR of compound VIb

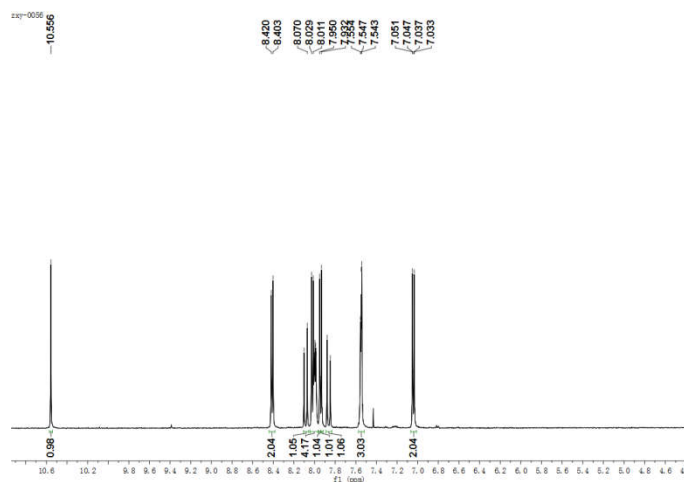

Fig. S6  $^1\text{H}$  NMR of compound VIc

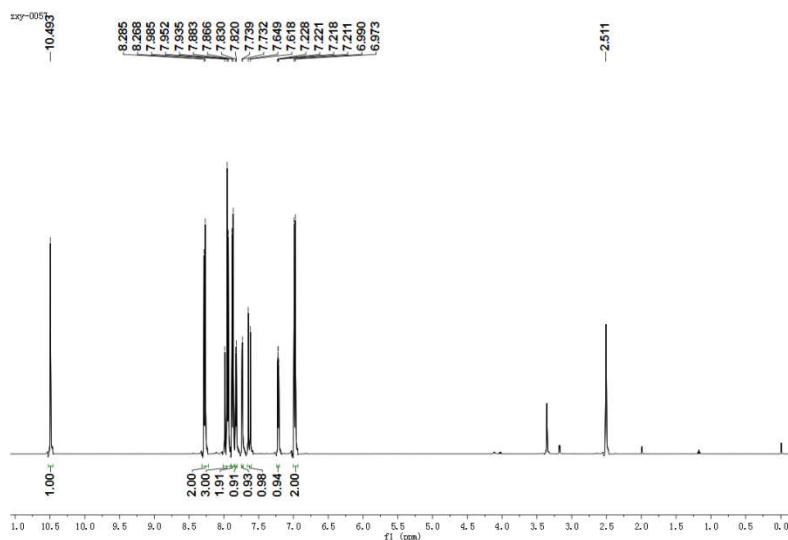

Fig. S7  $^1\text{H}$  NMR of compound VIId

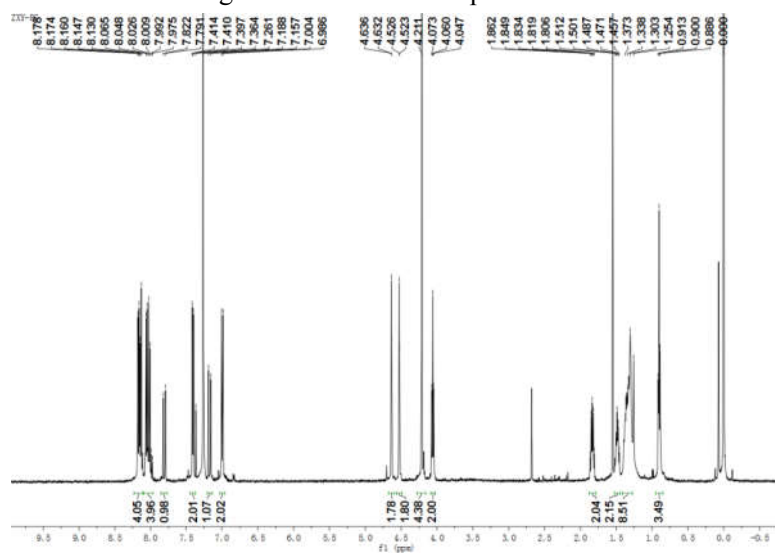

Fig. S8  $^1\text{H}$  NMR of compound Ia-8

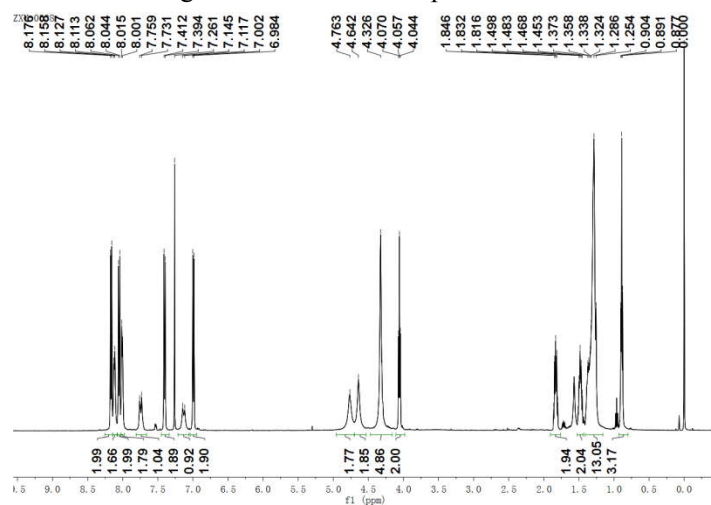

Fig. S9  $^1\text{H}$  NMR of compound Ia-10

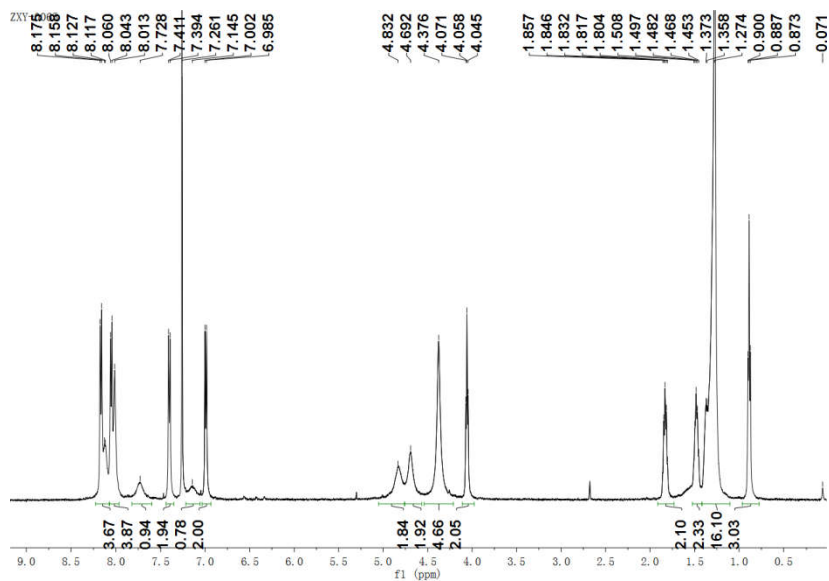

Fig. S10  $^1\text{H}$  NMR of compound **Ia-12**

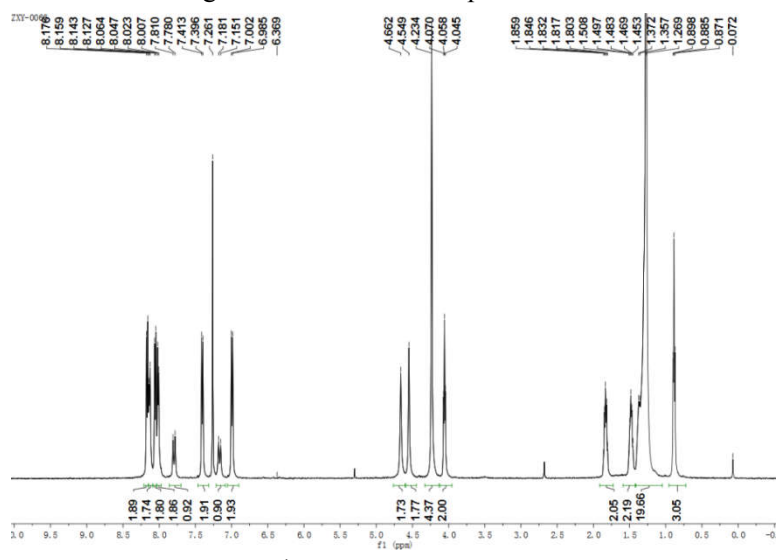

Fig. S11  $^1\text{H}$  NMR of compound **Ia-14**

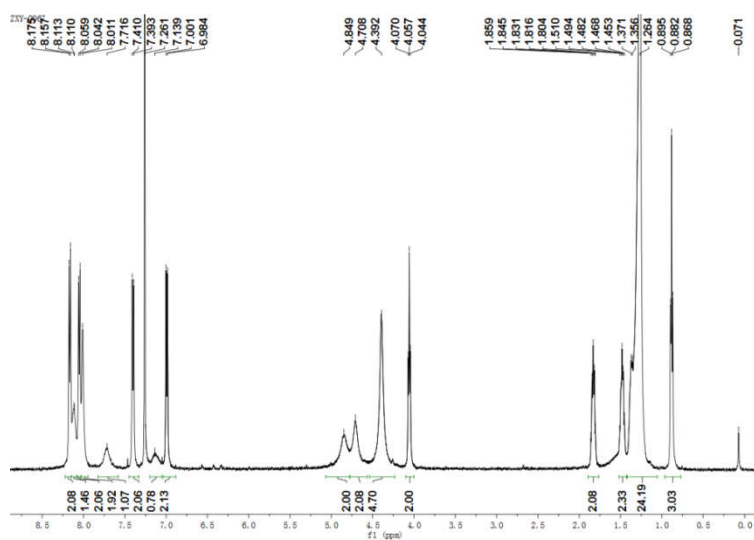

Fig. S12  $^1\text{H}$  NMR of compound **Ia-16**

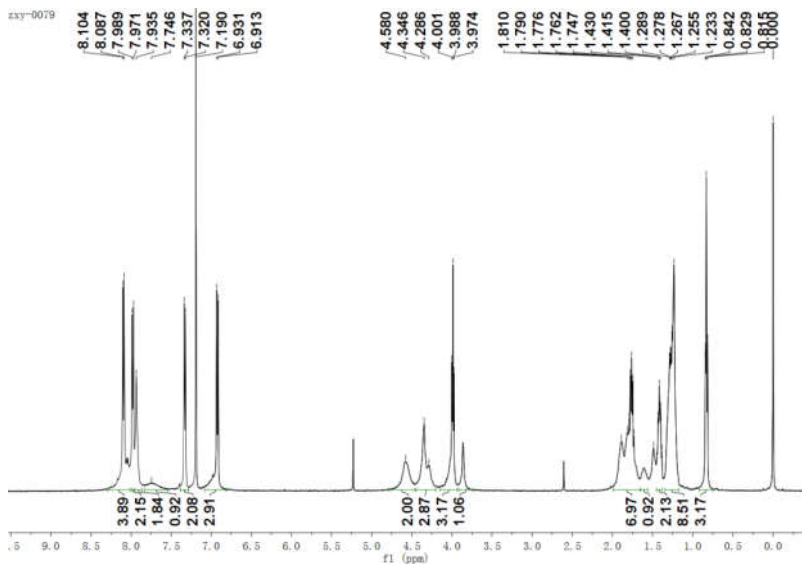

Fig. S13  $^1\text{H}$  NMR of compound **Ib-8**

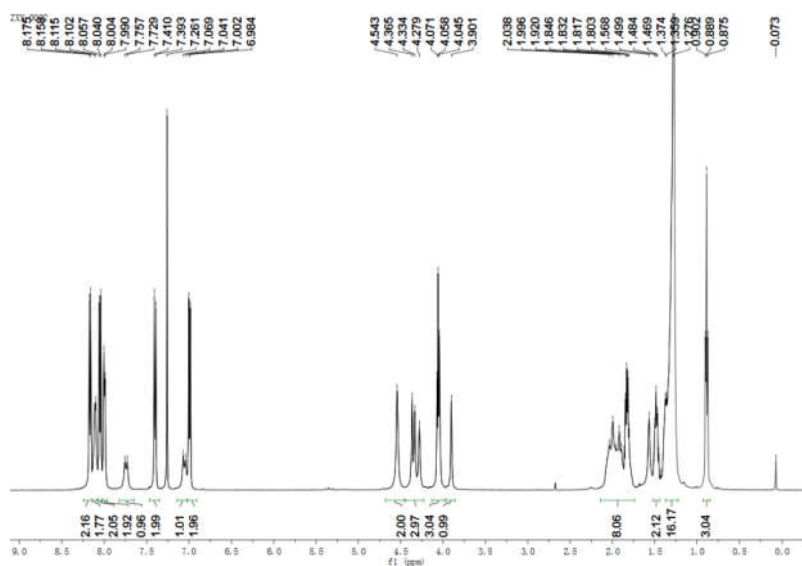

Fig. S14  $^1\text{H}$  NMR of compound **Ib-12**

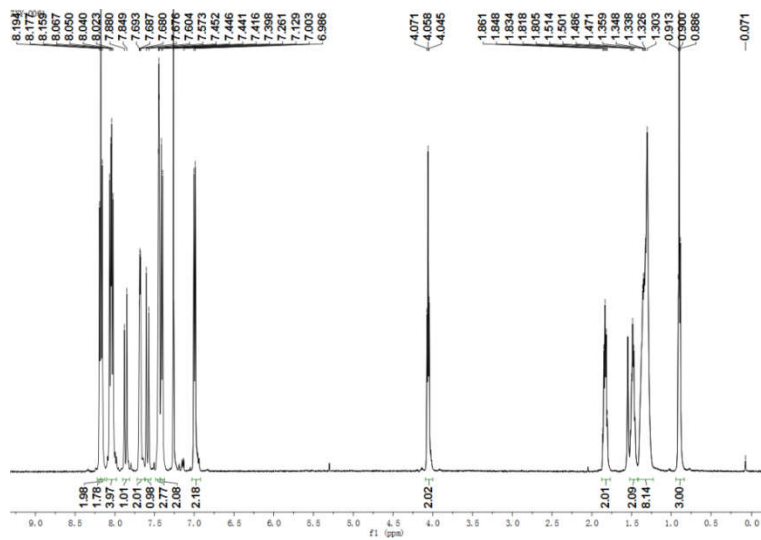

Fig. S15  $^1\text{H}$  NMR of compound **Ic-8**



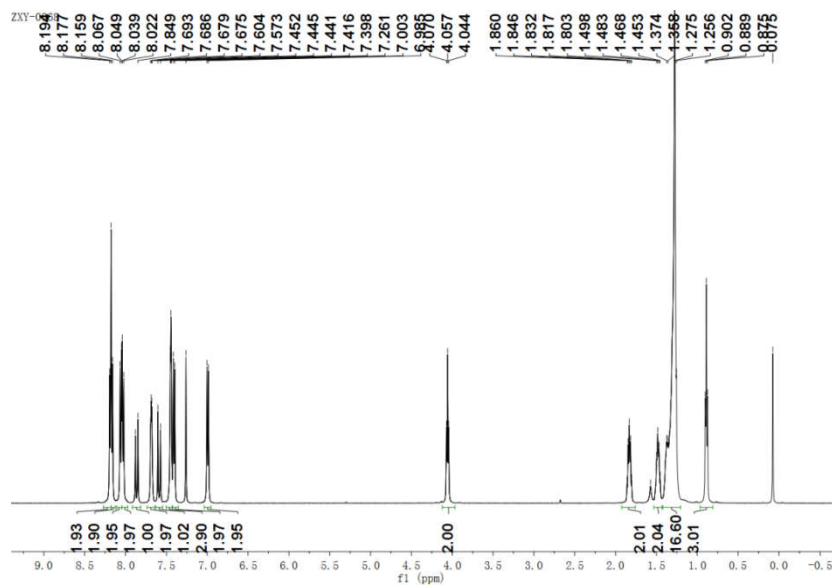

Fig. S16  $^1\text{H}$  NMR of compound **Ic-12**

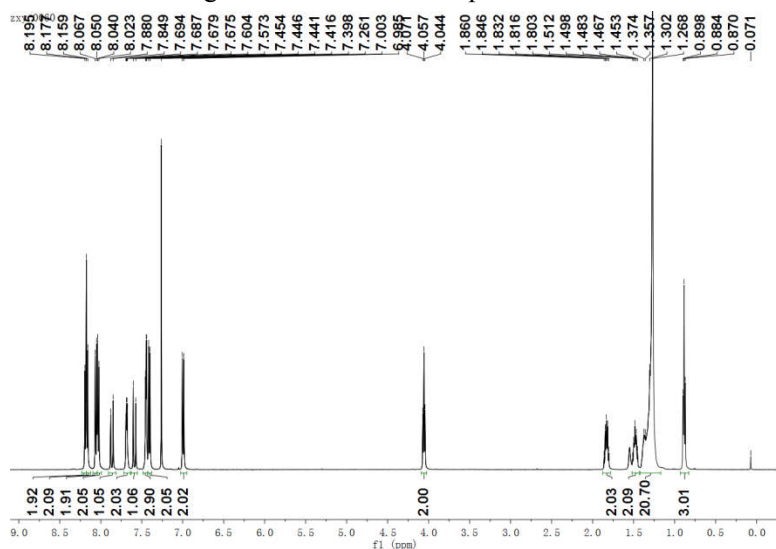

Fig. S17  $^1\text{H}$  NMR of compound **Ic-14**

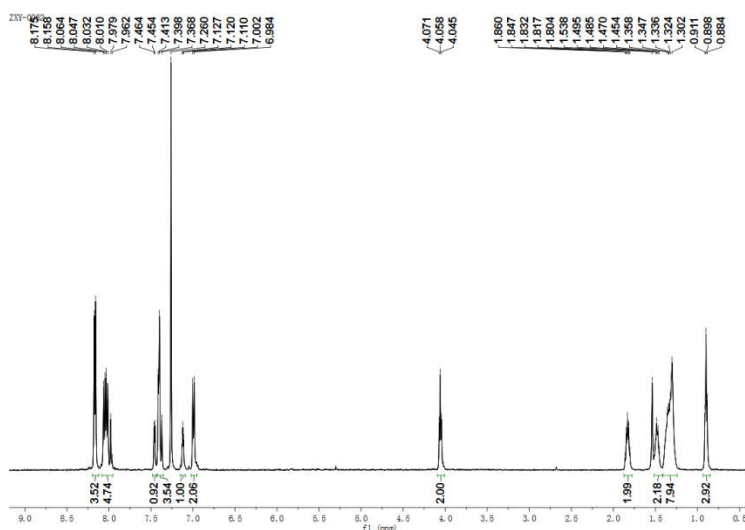

Fig. S18  $^1\text{H}$  NMR of compound **Id-8**

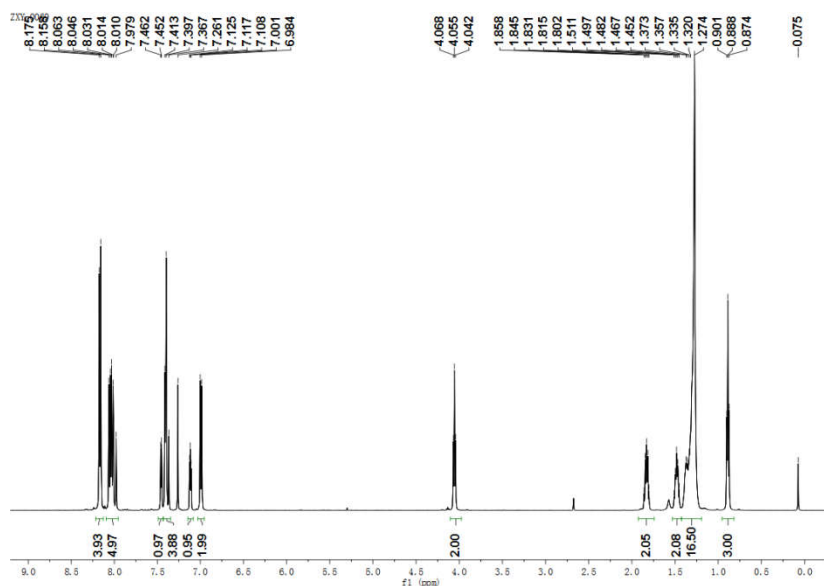

Fig. S19  $^1\text{H}$  NMR of compound **Id-12**

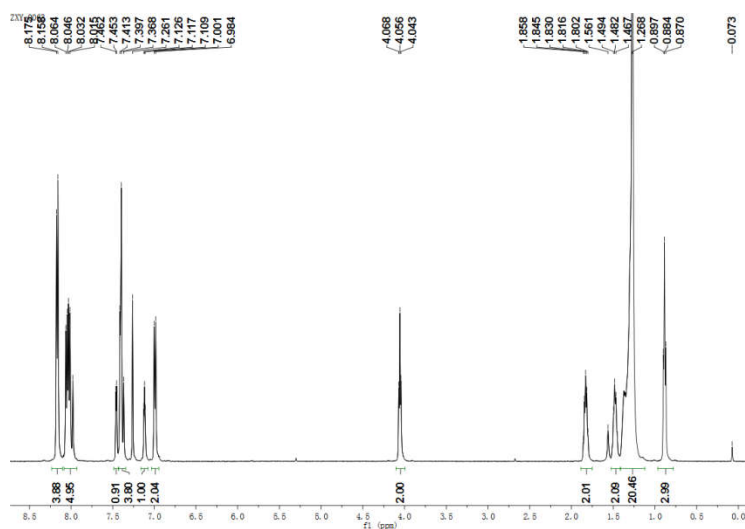

Fig. S20  $^1\text{H}$  NMR of compound **Id-14**

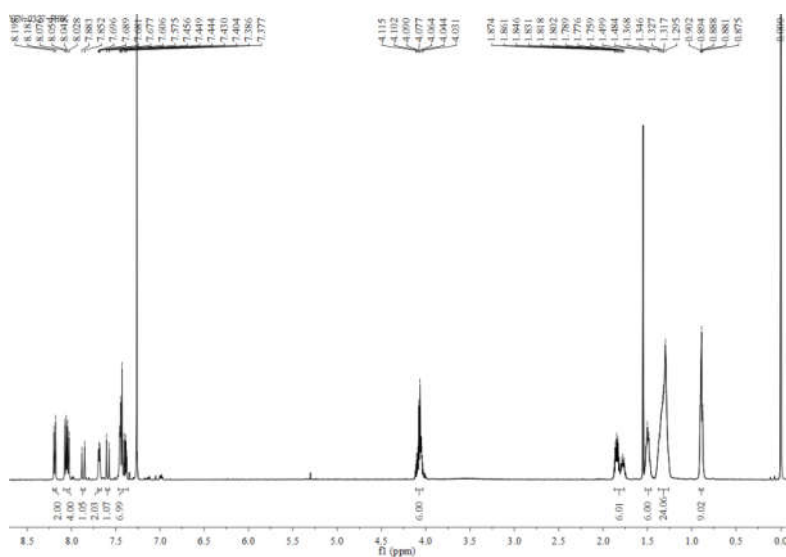

Fig. S21  $^1\text{H}$  NMR of compound **IIc-8**

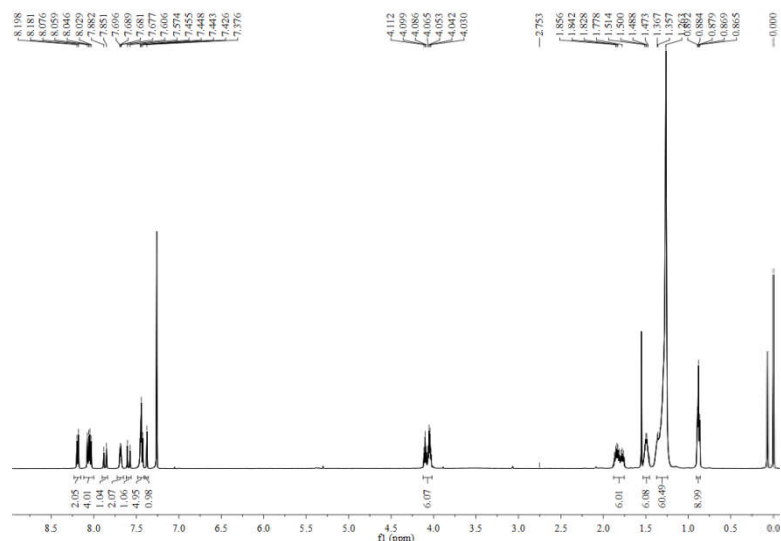

Fig. S22  $^1\text{H}$  NMR of compound **IIc-14**

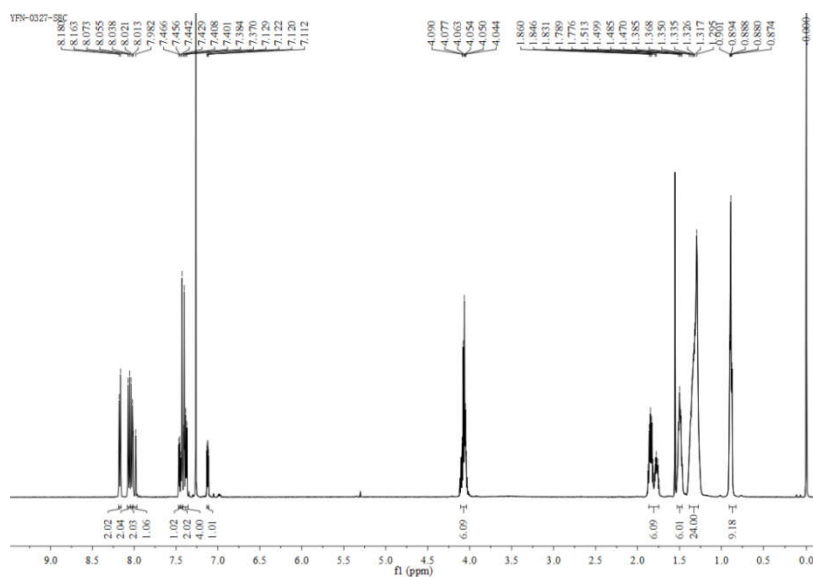

Fig. S23  $^1\text{H}$  NMR of compound **IIId-8**

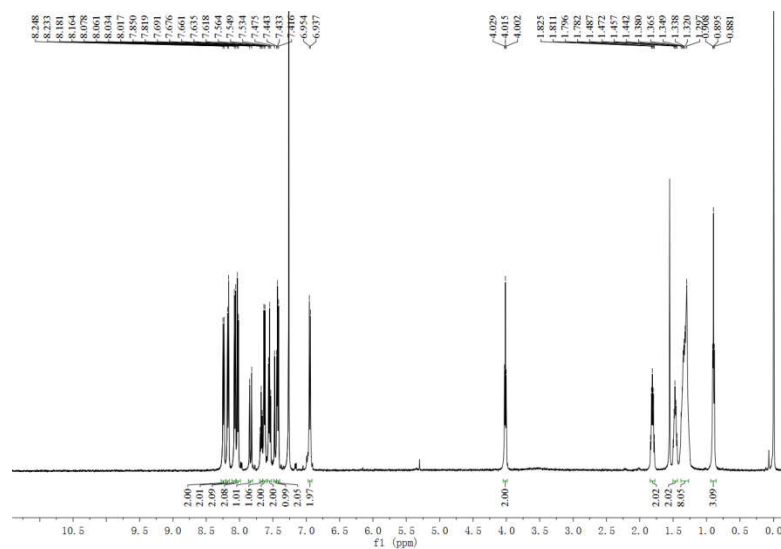

Fig. S24  $^1\text{H}$  NMR of compound **III-8**

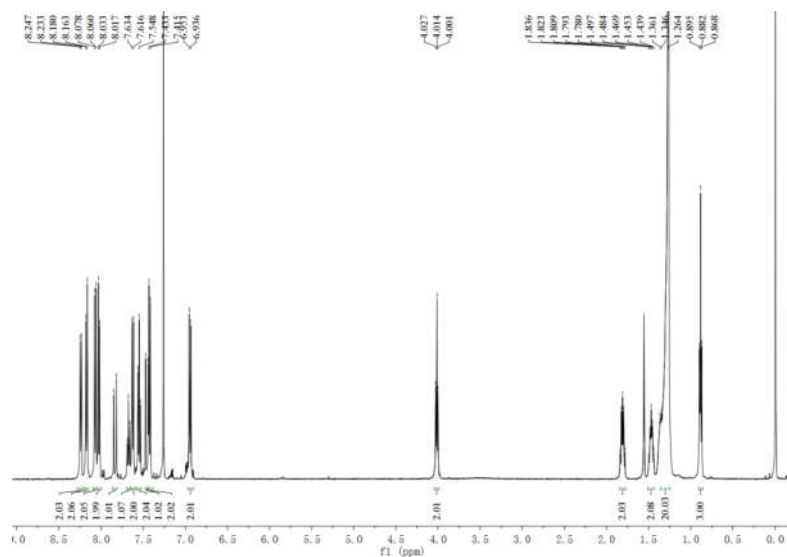

Fig. S25  $^1\text{H}$  NMR of compound III-14

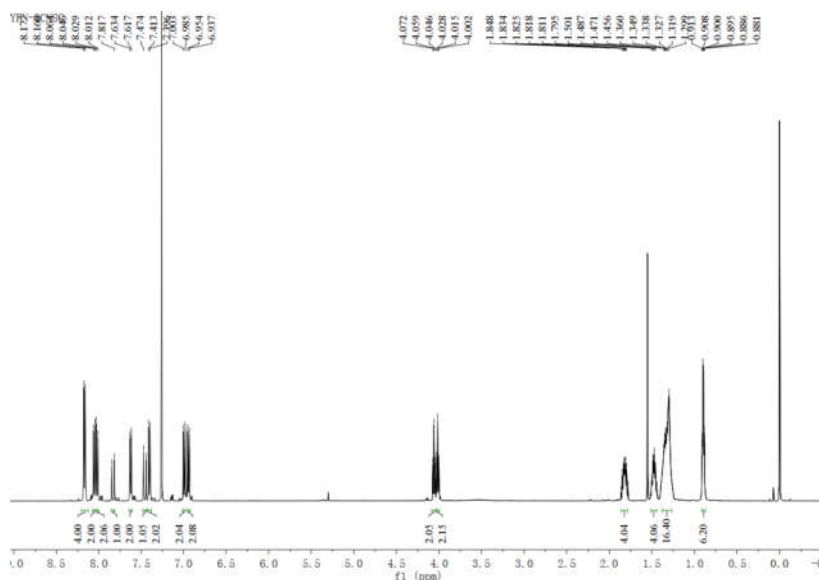

Fig. S26  $^1\text{H}$  NMR of compound IV-8

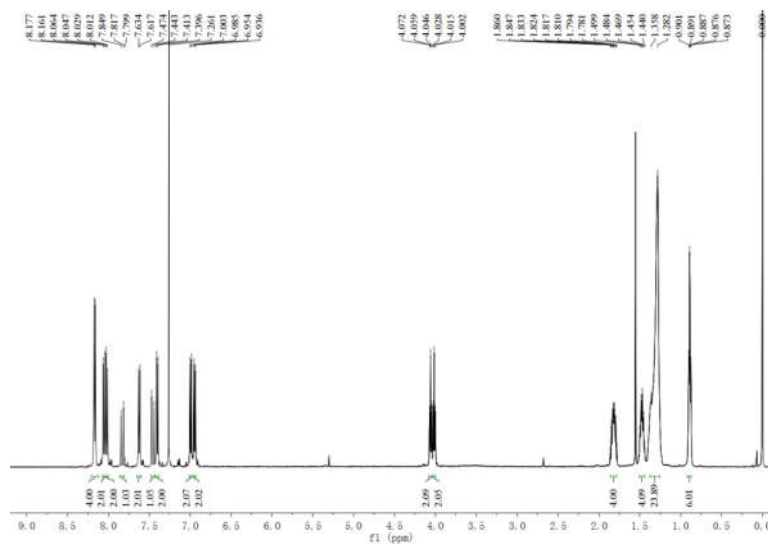

Fig. S27  $^1\text{H}$  NMR of compound IV-10

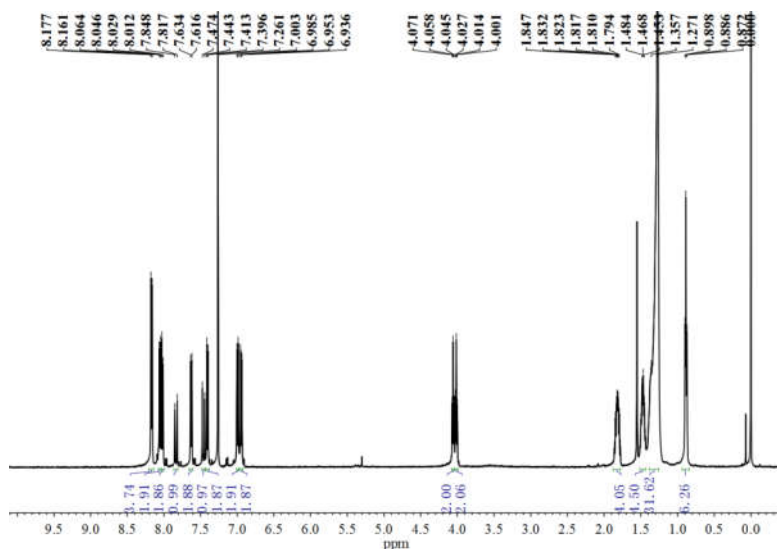

Fig. S28  $^1\text{H}$  NMR of compound IV-12

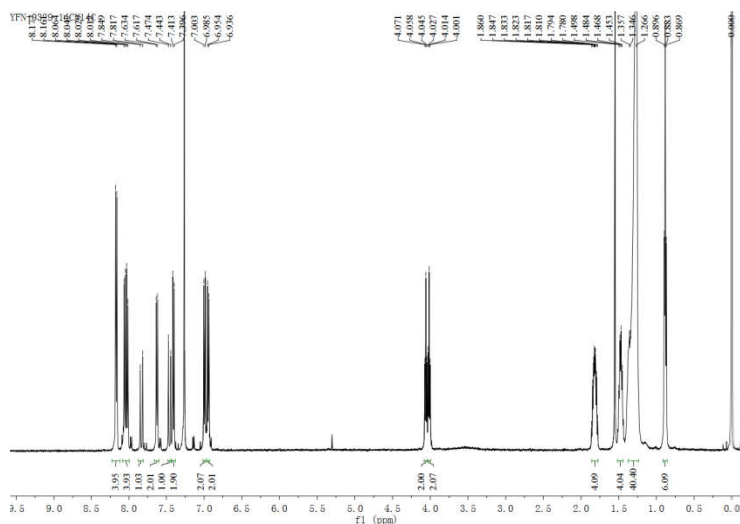

Fig. S29  $^1\text{H}$  NMR of compound IV-14

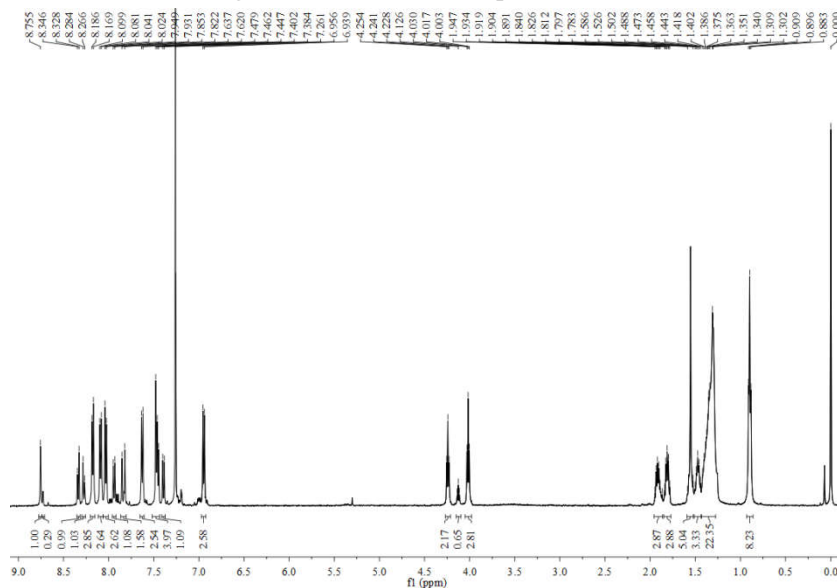

Fig. S30  $^1\text{H}$  NMR of compound V
